# Supplementary material for: GLA:D® Back group-based patient education integrated with exercises to support self-management of back pain - development, theories and scientific evidence -
Source: Springer Nature journal article supplement (doi:10.1186/s12891-018-2334-x), 2018-11-29

# GLA:D® Back

## WARM UP

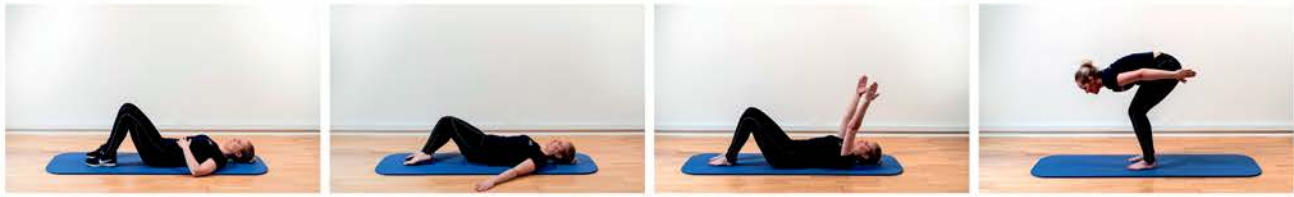

## BACK EXTENSORS

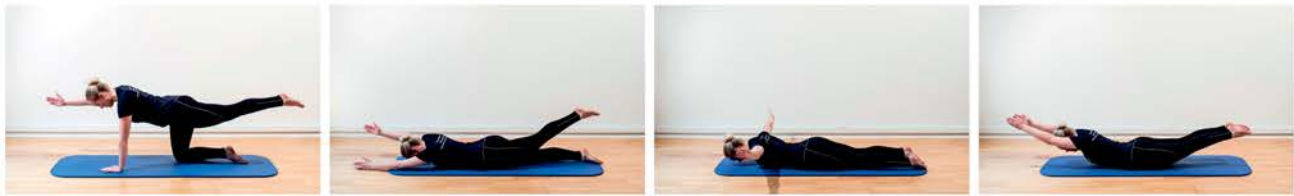

## ABDOMINALS

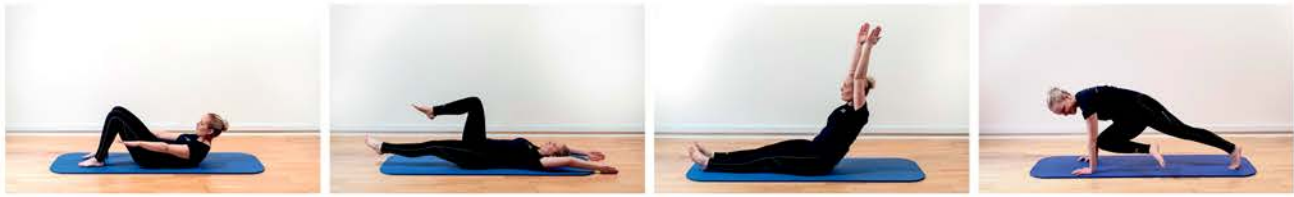

## LATERAL GLUTEALS

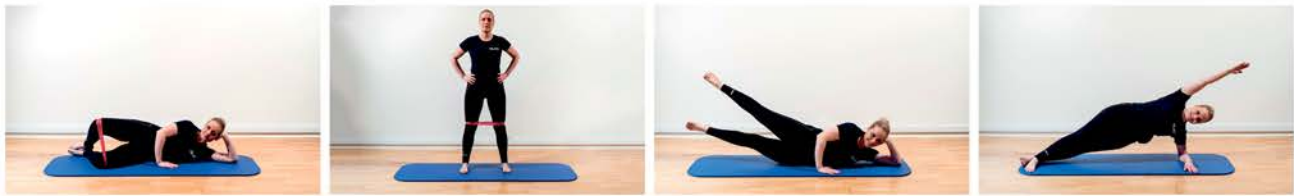

## BACK ROTATION

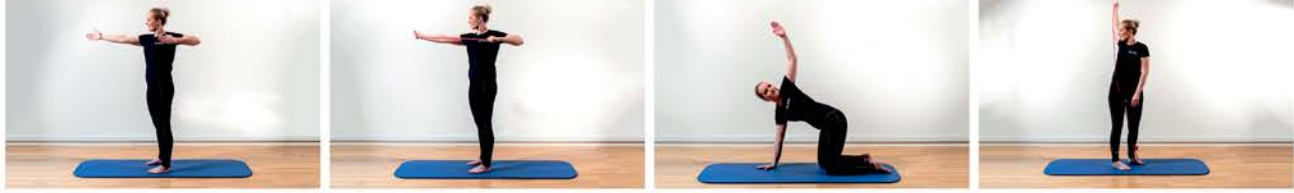

## POSTERIOR GLUTEALS

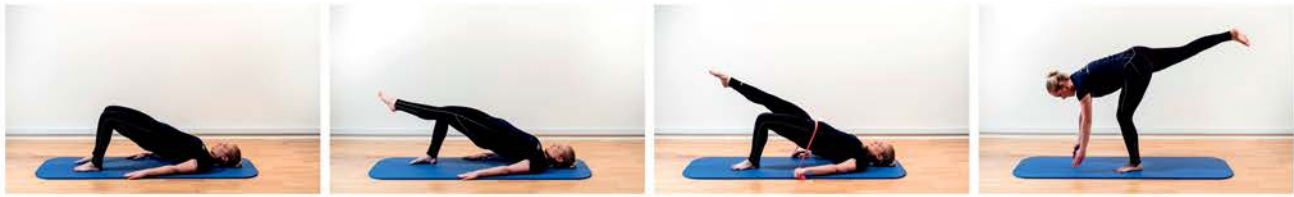

## LEG MUSCLES

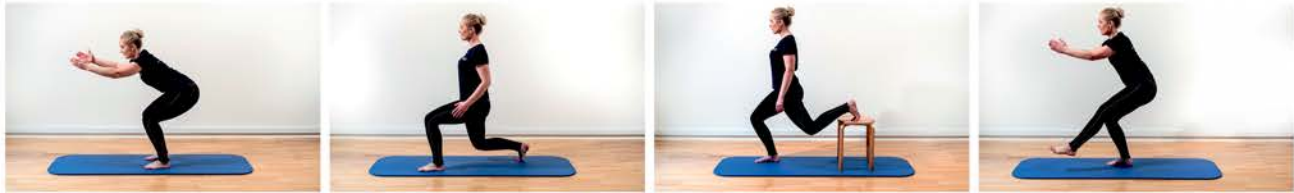

## OBLIQUE ABOMINALS

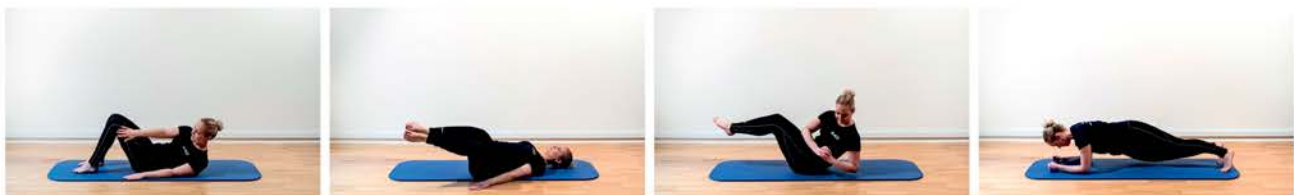

## FLEXIBILITY

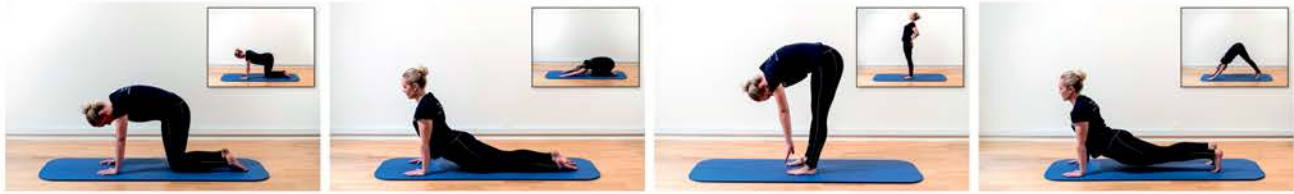

Supplement: MOESM1 [file 16304738]
